# Supplementary material for: Peters plus syndrome mutations affect the function and stability of human β1,3-glucosyltransferase
Source: PubMed Central journal article supplement (PMC8233153; doi:10.1016/j.jbc.2021.100843), 2021-05-28

**Supporting Information for:**

**Peters plus syndrome mutations affect the function and stability of human  $\beta$ 1,3-glucosyltransferase**

Ao Zhang, Aarya Venkat, Rahil Taujale, James L. Mull, Atsuko Ito, Natarajan Kannan, Robert S. Haltiwanger

Contents:

Table S1

Figures S1-S11

**Supporting Information Table:**

**Table S1. Site-directed mutagenesis primers for human B3GLCT construct.**

| Clone | Primer name                                     | Sequence (5' → 3')                                     |
|-------|-------------------------------------------------|--------------------------------------------------------|
| D349N | AI73 f                                          | AGTCATTGTGA <u>AT</u> GATGATACATTAATAAGTATCTCCAGGCTCC  |
|       | AI74 r                                          | GTATCATCAT <u>T</u> CACAATGACTAACCATGCTGTTTTGTCCTG     |
| G393E | KZ21 f                                          | CACGGGAGA <u>A</u> GGAGGAATGGTCTTCAGCAGAG              |
|       | KZ22 r                                          | ATTCCTCCT <u>T</u> CTCCCGTGATGTAGCTGTAGCC              |
| G394E | KZ23 f                                          | GGGAGGAGA <u>A</u> AGGAATGGTCTTCAGCAGAGAAG             |
|       | KZ24 r                                          | ACCATTCCCT <u>T</u> CTCCTCCCGTGATGTAGCTGT              |
| Q457R | KZ07 f                                          | TTCTCATCGG <u>G</u> TCCCATATCGTTCCACAAAC               |
|       | KZ08 r                                          | ATGGGAAC <u>CC</u> GATGAGAAAGGTAGTCCTTAGG              |
| T179S | KZ41 f                                          | CGAGAATCCT <u>T</u> CAGTTTTTAAGTATCCAGACTTTG           |
|       | KZ42 r                                          | CTTAAAACTGA <u>AG</u> GATTCTCGGAAAAGGCATAATG           |
| V245M | KZ43 f                                          | GTACCAATGAC <u>A</u> TGGACTTCTACTGTGCTACCACATTC        |
|       | KZ44 r                                          | GTAGAAGTCC <u>A</u> TGTCATTGGTACAAAACTCAGGCACTG        |
| R337H | KZ45 f                                          | TTTCTGAATC <u>A</u> TAGCCAGGACAAAACAGCATGG             |
|       | KZ46 r                                          | GTCCTGGCTAT <u>G</u> ATTCAGAAATCTTTCCAAAATGG           |
| Y366* | KZ17 f                                          | AGCTGTTA <u>A</u> AGACTCCGGCGAGCCTGTGTTT               |
|       | KZ18 r                                          | GCCGGAGT <u>C</u> TAAACAGCTAAGCAAGTGCTG                |
| R412* | KZ19 f                                          | AGTAAATGT <u>T</u> GATGCTACAGCAATGATGCTC               |
|       | KZ20 r                                          | CTGTAGCAT <u>C</u> AACATTTACTGGCGAGAA                  |
| E132A | KZ49 f                                          | CTTCTGTG <u>CC</u> GAAGAGACAAGAATACAGATTCCAAAACCTTGG   |
|       | KZ50 r                                          | CTTGTCTCT <u>T</u> CGGCACAGAAGAAAATCCAAGATGAATTTCTGCTA |
| D421A | KZ55 f                                          | TCCCGATG <u>CC</u> ATGGTCCTGGGAATGTGCTTTAG             |
|       | KZ56 r                                          | AGGACCATG <u>G</u> CATCGGGAGCATCATTGCTGTAGC            |
| CT1   | AI210 f                                         | GAGTTTTGTACCAATGACGTGGACTTCTAC                         |
|       | AI214 r<br>(pcDNA3.1)<br>AI213 r<br>(pSecTag2C) | AGCCAAACCAAAGCCAGGGAG<br>GGCCGCGTCACCAGTGG             |
| CT2   | AI211 f                                         | ACATTCCATTCTTTTCTACCGCTTTGTAG                          |
|       | AI214 r<br>(pcDNA3.1)<br>AI213 r<br>(pSecTag2C) | AGCCAAACCAAAGCCAGGGAG<br>GGCCGCGTCACCAGTGG             |

|     |                                                 |                                                      |
|-----|-------------------------------------------------|------------------------------------------------------|
| CT3 | AI212 f                                         | AAGCCAGTGAAGAAGAAGGATATTTTTGTTG                      |
|     | AI214 r<br>(pcDNA3.1)<br>AI213 r<br>(pSecTag2C) | AGCCAAACCAAAGCCAGGGAG<br>GGCCGCGTCACCAGTGG           |
| NT1 | AI337 f                                         | CTGAGTTTTG <u>A</u> ACCAATGACGTGGACTTCTACTGTG        |
|     | AI338 r                                         | CGTCATTGGT <u>T</u> CAAACTCAGGCACTGGGGTC             |
| NT2 | AI339 f                                         | TGTGCTACCTG <u>A</u> TTCATTCTTTTCTACCGCTTTGTAGAAAGCC |
|     | AI340 r                                         | GAATGGAAT <u>C</u> AGGTAGCACAGTAGAAGTCCACGTCATTGG    |
| NT3 | AI341 f                                         | GCTTTGTAGAT <u>A</u> GCCAGTGAAGAAGAAGGATATTTTTGTTGC  |
|     | AI342 r                                         | TTCACTGGCTAT <u>T</u> CTACAAAGCGGTAGAAAAGAATGGAATG   |

***Supporting Information Figure Legends:***

**Supporting information**

**Figure S1. Alignment of B3GLCT sequences from multiple species.** Multiple sequence alignment of B3GLCT from human (UNIPROT Q6Y288), mouse (UNIRPOT Q8BHT6), zebrafish (UNIRPOTA0A068F9P7), fruitfly (UNIPROT X2JDC2), and starfish (NCBI REFSEQ XP\_038056415.1) were aligned with the MAFFT software/algorithm. Red background highlights regions of 100% sequence identity within the shown sequences; red letters indicate regions of 100% sequence similarity; blue rectangles enclose sets of conserved residues. Annotated domains are highlighted under amino acid sequences.

**Figure S2. Time-dependent *in vitro* enzyme assay to determine the linear phase of the transfer reaction catalyzed by B3GLCT.** 0.5  $\mu$ g purified B3GLCT, 50  $\mu$ M UDP-Glc and three different concentrations of pNP-Fuc were analyzed. Reactions were stopped by freezing on dry ice. All reactions were incubated at 37 °C.

**Figure S3. Neither the B3GLCT C-GT nor N-GT-like domains expressed alone. (A)** Domain map of human B3GLCT with amino acids cutoff for N-GT-like domain and C-GT domain constructs. Each N-GT-like domain (NT1, NT2, NT3) or C-GT domain construct (CT1, CT2, CT3) contained amino acids ending or beginning as indicated. SP, signal peptide; N-GT-like, N-terminal GT-like domain; C-GT, C-terminal GT domain; REEL, C-terminus containing KDEL-like motif. **(B)** Plasmids encoding ADAMTS20 TSR2-8-Myc-His<sub>6</sub> and GFP were co-transfected into WT or *B3GLCT*<sup>-/-</sup> HEK293T cells. Rescue experiments were performed by co-transfection

with plasmids encoding full-length WT B3GLCT (wtB3), or the CT1, CT2 or CT3 constructs, all with the REEL ER-retention motif. Media and cell lysates were analyzed by Western blot probed with anti-Myc (red, 50 kDa) to detect ADAMTS20 TSR2-8 (TSR2-8), and anti-B3GLCT for B3GLCT WT or mutants (green, 50 kDa, mutants expected <50kDa). Anti-GFP for transfection and loading control (red, 25 kDa). **(C)** Plasmids encoding WT, NT1, NT2, and NT3, all generated with the N-His6-B3GLCT construct, were co-transfected into WT HEK293 cells with GFP plasmid. Media and cell lysates were analyzed by Western blot probed with anti-His<sub>6</sub>-tag (red, WT 50 kDa, mutants <50 kDa) and anti-GFP for transfection (green, 25 kDa).

**Figure S4. Coomassie blue staining of purified WT and PTRPLS/PTRPLS-like mutant enzymes.** Bovine serum albumin (BSA) standards and purified B3GLCT WT, PTRPLS (black) and PTRPLS-like (blue) mutants were separated by 10% SDS-PAGE and stained with Coomassie blue for imaging. For purified enzymes, 5  $\mu$ L of eluate was loaded in each lane.

**Figure S5. B3GLCT with PTRPLS mutations did not rescue secretion of ADAMTS20 TSR2-8 while PTRPLS-like mutations did.** Plasmids encoding ADAMTS20 TSR2-8-Myc-His<sub>6</sub> (TSR2-8) and GFP were co-transfected into wild type (WT) and *B3GLCT* knockout (*B3GLCT*<sup>-/-</sup>) HEK293T cells. PTRPLS mutations are colored in black and PTRPLS-like mutations in blue. Rescue experiments were performed by co-transfection with a plasmid encoding full-length B3GLCT WT, G393E, and G394E **(A)**, Q457R and T179S **(B)**, and V245M and R337H **(C)** (B3GLCT) with serial dilutions. Serial dilutions of B3GLCT plasmids were performed starting with 0.24  $\mu$ g of plasmid diluted 5-, 10-, and 20-fold. Media and cell lysates were analyzed by Western blot probed with anti-Myc (red) to detect ADAMTS20 TSR2-8, anti-

B3GLCT to detect endogenous or transfected B3GLCT (green, 50 kDa), and anti-GFP for transfection and loading control (green, 25 kDa).

**Figure S6. B3GLCT mutants G393E and Q457R destabilized the enzyme.** Melting curve (A) and first derivative showing the melting peak (B) of WT and mutants were analyzed using the thermo shift protein stability assays described in Experimental Procedures. 10% glycerol in TBS was used as negative control to monitor the background. Arrows in (B) point to reduced melting temperature of G393E (blue) and Q457R (orange).

**Figure S7. PTRPLS nonsense mutations at Y366 and R412 result in deletion of important catalytic residues.** Ribbon presentation of structures for B3GLCT C-GT Y366\* (A) and R412\* (B). Light blue ribbon represented the backbone of B3GLCT C-GT. Light blue, residues without mutations; salmon, residues at which had PTRPLS mutations; yellow, residues at which had PTRPLS-like mutations (blue letters).

**Figure S8. Internal core structures of B3GLCT C-GT aligned with the cores of MFNG and B3GNT2.** Protein backbone alignment between B3GLCT C-GT model (tan), MFNG (PDB 2J0B, blue) and B3GNT2 (PDB 7JHN, purple). Structure alignment was visualized with Chimera.

**Figure S9. Sequence alignment revealed that B3GLCT C-GT has conserved motifs of GT31 family enzymes.** Amino acid sequence of human B3GLCT (UNIPROT Q6Y288) was aligned to

the sequences of human B3GNT2 (UNIPROT Q9NY97) and mouse MFNG (UNIPROT O09008). DxD motif, dark blue; Glycine rich loop, magenta; xED motif, purple; C-His, orange.

**Figure S10. B3GLCT is active in the absence of divalent cations.** *In vitro* enzyme assays of B3GLCT with UDP-Glc and Fuc-*O*-TSR3 were supplied with various divalent metal ions at three different concentrations. 10x stock solutions of MnCl<sub>2</sub>, MgCl<sub>2</sub>, CaCl<sub>2</sub> and EDTA were supplemented to each reaction to make final in-reaction concentrations as described. Statistical analysis was performed with One-way ANOVA in Prism 7. Error bars, standard deviation, n=3; \*p<0.05; \*\*p<0.01.

**Figure S11. B3GLCT N-GT-like domain adopts a GT-A fold.** (A) Protein backbone alignment between B3GLCT N-GT-like domain (tan), B3GLCT C-GT model (green), MFNG (PDB 2J0B, blue) and B3GNT2 (PDB 7JHN, purple). Structure alignment was visualized with Chimera. (B) The DxD motif, G-loop, catalytic aspartic acid, and C-His for B3GLCT N-GT-like domain model (tan), C-GT domain model (green) are aligned with MFNG (PDB 2J0B, blue), B3GNT2 (PDB 7JHN, purple). DxD motifs, G-loops, and catalytic aspartic acid of all four domains also overlaid, whereas C-His of the N-GT domain is missing.

Figure S1

1 10 20 30 40  
 HUMAN MRPPAC.....WVLLAPPA**LLALL**LCSLAFGLASEDTKKEVK.QSQDLEKSGI  
 MOUSE MR.....PPA**LLALL**FCSSAAFALMSEIEKEKVT.PSQDLRQSSL  
 ZEBRAFISH **ML**SIKQNGYSVTVYFFLW.....S**LVAFIT**AK.....GDEVENPAKVHGTDKPSSG.  
 FRUITFLY **MP**TRIC.....VLFGLL.....C**LA**SL**CG**CS.....NKPG.  
 STARFISH **MA**ASIV.....A**EVGLIT**GVFAATF.....DPYFPRDLTVAEPNL

50 60 70 80 90  
 HUMAN SRKNDIDLK**GIVFVI**Q**SQSN**S**FHAKRAEQ**...**LKKSITKQ**AAD**LTQE**..L**PS**..V**LLLH**  
 MOUSE PGRHNDIDLK**EIVFVI**Q**SQSN**S**FHAKRAEQ**...**LKKNILKQ**AAN**LQD**..L**PR**..V**LLLH**  
 ZEBRAFISH ...SQDLDR**EIVFVI**Q**SQRN**S**FHVRQA**EK...**LRKDLLLQ**QT**LQES**..P**V**..I**LLLH**  
 FRUITFLY .....**EVLVVI**AC...P**HPQA**AR**SDCLA**L**SHNVLE**Q**QRA**L**ELAGIF**P**EDF**V**LKLVH**  
 STARFISH EGHHTATGE**DLVFIR**S**QQA**S**PHDQWAKQ**...**VKADILQ**Q**YRI**L**ELG**..N**PQ**..V**LLLH**

100 110 120 130 140 150  
 HUMAN **QLAKQE****GAWTILPLPHF**SVT...Y**SRNS**S**SWIFF****FCEEE****TRT**..Q**IPKLE**T**LRRYD**P**SKEW**  
 MOUSE **QLAKQE****GAWTILPLPHF**SVT...Y**SKNS**A**WIFF****FCEEE****TRL**..Q**IPRLD**T**LRRYD**P**SKEW**  
 ZEBRAFISH **TL**SDNE**G**W**STILPLPR**L**SSQ**...F**GKNS**S**SWIM****FLEED****TRV**..K**LQKLE**H**V**L**KKF**D**RK**E**W**  
 FRUITFLY **VM**HEL**FNS**W**ITMDALPH**L**R**AQ**ARV**L**GAR**T**EWITWC**Q**HNT**R**V**S**SLRGL**E**LQ**L**RRQN**P**RELA**  
 STARFISH **QQ**Y**EF**S**G**V**WITLPVLP**K**L**N**ED**...E**GQ**..A**KWIF****FCEEQ****TRV**..S**VH**E**GLQ**V**L**T**KYN**P**Q**E**W**

## N-GT-like Domain

160 170 180 190 200 210  
 HUMAN **FLGKALHDE**E**ATI**I**H**H**YAF**S**ENPTV**V**KYP**D**F**A**AGWALS**I**FLVN**K**LTKRL**...K**SE**S**LK**S  
 MOUSE **FLGKALYDE**E**STI**I**H**H**YAF**S**ENPTV**V**KYP**D**F**A**AGWALS**I**PLVN**K**LAKRL**...K**SE**A**LK**S  
 ZEBRAFISH **FLGKPLHDE**E**STI**I**H**H**YAF**S**ENPTA**E**Y**P**D**F**S**A**GWALS**I**FLIN**R**L**A**S**K**I**...E**E**E**P**L**K**S  
 FRUITFLY **FYGHALYDA**E**ATI**I**H**H**YAF**S**NYKDP**Q**RE**F**Y**P**M**L**S**A**GVVF**T**G**A**LLRR**L**ADLV**A**P**S**G**Q**N**I**V**H**S**  
 STARFISH **FLGRALQ**D**R**A**ASVITH**H**YR**E**H**D**DP**S**K**S**Y**P**D**F**E**A**GW**L**I**S**TGL**L**R**G**LAD**R**W**...E**TE**E**H**R**M**

220 230 240  
 HUMAN **DFTIDLKHE**E**ALYI**W**D**K...G**GG**P**ELT**P**V**P**EE****CT**...N**D**V**D**F**Y**...  
 MOUSE **DFTIDLKHE**E**ALYI**W**D**K...G**GG**P**AL**T**P**V**PE****CT**...E**D**V**D**P**R**...  
 ZEBRAFISH **DFTIDLKHE**V**ALYI**W**D**K...G**GK**P**RL**T**G**V**P**E**L****CT**..A**E**H**N**K**R**A**Q**S...  
 FRUITFLY **D**F**S**I**D**A**S**H**E**L**A**R**E**F**I**W**D**N**V**S**P**D**P**H**I**S**T**P**I**S**G**G**I**L**L**K**S**A**S**Y**I**C**S**T**P**T**S**V**P**N**R**K**L**P**C**...  
 STARFISH **D**F**S**I**D**V**K**H**E**L**A**Y**I**L**N**D...G**N**G**T**R**L**T**A**L**P**A**L**C**A**G...N**V**E**E**N**P**A**P**R**S**D**S**E**I**R

## Linker

250 260 270 280  
 HUMAN .....C**ATT**F**H**S**F**L**P**L**C**R**K**P**V**K**K**K**D**I**F**V**AV**K**T**C**K**K**F**H**G**D**R**I**P**I**V**K  
 MOUSE .....C**VTT**F**H**S**F**L**P**L**C**G**V**P**V**K**K**E**E**I**F**V**AV**K**T**C**K**K**F**H**A**D**R**I**P**I**V**K  
 ZEBRAFISH .....C**ATT**V**S**H**S**P**L**C**G**E**P**V**K**I**E**N**I**F**V**AV**K**T**C**K**K**F**H**S**D**R**I**P**V**V**K**  
 FRUITFLY ..L**H**A**Q**P**E**E**P**L**T**L**G**Q**R**R**N**G**C**E**HT**T**G**S**H**...I**Y**F**A**I**K**T**C**K**K**F**H**K**E**R**I**P**I**E  
 STARFISH K**A**L**N**K**A**I**R**D**G**P...Q**E**E**D**G**C**V**S**A**H**P**K**G**L**P**T**C**A**E**A**V**L**K**E**D**IL**F**AV**K**T**C**K**K**F**H**K**D**R**V**P**I**V**Q

290 300 310 320 330 340  
 HUMAN **Q**T**W**E**S**Q**AS**L**I**E**Y**S**D**Y**T**E**N**S**I**P**T**V**D**I**G**I**P**N**T**D**R**G**H**C**G**K**T**F**A**I**L**E**R**F**L**N**R**..S**Q**D**K**T**A**W**L**V  
 MOUSE **K**T**W**A**A**Q**AS**L**I**E**Y**S**D**Y**A**E**T**A**I**P**T**V**D**I**G**I**P**N**T**D**R**G**H**C**G**K**T**F**A**I**L**E**K**F**L**N**H**..S**H**N**K**I**S**W**L**V  
 ZEBRAFISH **K**T**W**G**K**Q**AS**L**I**E**Y**S**D**Y**A**D**E**P**I**P**T**I**N**L**G**I**P**N**T**E**R**G**H**C**G**K**T**F**A**I**L**R**R**F**L**S**S**..H**V**P**R**T**D**W**L**L  
 FRUITFLY **R**T**W**A**A**D**AR**N**R**R**Y**S**D**V**A**D**V**G**I**P**A**I**G**T**I**G**I**P**N**V**Q**T**G**H**C**A**K**M**A**I**L**Q**L**S**L**K**D**I**G**K**Q**L**D**I**R**W**L**  
 STARFISH **Q**T**W**G**K**H**T**S**H**I**V**F**V**S**D**V**Q**D**D**T**I**P**T**I**A**S**G**V**P**N**T**E**R**G**H**C**G**K**L**F**A**I**F**E**M**F**N**S**K**..P**E**Y**L**K**Y**S**W**L**V**

## C-GT Domain

350 360 370 380 390  
 HUMAN **I**V**D**D**D**T**L**I.....S**I**S**R**L**Q**H**LL**S**C**Y**D**S**G**E**P**V**F**L**G**E**R**Y**G**Y**G**..L**G**T**G**..G**Y**S**Y**I**T**G**G**  
 MOUSE **I**V**D**D**D**T**L**I.....S**I**S**R**L**R**H**LL**S**C**Y**D**S**S**D**P**V**F**L**G**E**R**Y**G**Y**G**..I**G**T**G**..G**Y**S**Y**V**T**G**G**  
 ZEBRAFISH **I**V**D**D**D**T**L**I.....S**L**P**R**V**Q**A**LL**S**C**Y**E**S**S**E**P**L**C**L**G**E**R**Y**G**Y**G**..I**G**Q**G**..G**Y**S**Y**I**T**G**G**  
 FRUITFLY **I**V**D**D**D**T**L**L**S**L**H**L**I**H**T**H**L**P**T**..S**V**P**R**V**S**A**LL**C**R**H**N**A**T**E**L**V**L**L**G**Q**R**Y**G**Y**R**..L**H**A**P**D**G**F**N**Y**H**T**G**G  
 STARFISH **V**A**D**D**D**T**L**L.....S**V**A**R**L**R**A**LL**S**C**Y**N**A**K**K**L**V**F**L**G**E**R**Y**G**Y**G**H**L**K**L**G**W**G**Y**D**V**L**T**G**G**

400 410 420 430 440 450  
 HUMAN **G**C**M**V**S**S**R**E**A**V**R**R**L**L**A**S**K**R**C**R**C**Y**S**N**D**A**P**D**D**M**V**L**G**M**C**F**S**G**L**G**T**F**V**T**H**S**P**L**F**H**Q**A**R**P**V**D**Y**P**K**D**Y**  
 MOUSE **G**G**M**V**S**S**R**E**A**I**R**R**L**L**V**S**S**C**R**C**Y**S**N**D**A**P**D**D**M**V**L**G**M**C**F**S**G**L**G**V**P**V**T**H**S**P**L**F**H**Q**A**R**P**V**D**Y**P**K**D**Y  
 ZEBRAFISH **G**G**M**L**S**S**R**E**A**V**V**Q**L**L**S**S**G**N**C**R**C**Y**S**N**D**A**P**D**D**M**V**L**G**M**C**L**N**S**L**R**V**P**V**T**H**S**P**L**F**H**Q**A**R**P**D**Y**A**R**D**F  
 FRUITFLY **A**G**I**V**L**S**L**P**L**V**R**L**I**V**Q**R**C**S**C**P**S**A**S**A**P**D**D**M**I**L**G**M**C**L**Q**A**L**L**V**P**A**I**H**V**A**G**M**H**Q**A**R**P**Q**D**Y**A**G**E**L**  
 STARFISH **G**G**M**I**S**S**R**A**G**I**Q**L**L**A**T**G**C**K**N**K**D**E**D**P**D**D**M**I**F**G**M**C**T**K**R**H**M**I**P**I**T**H**S**P**L**F**H**Q**A**R**P**S**D**Y**A**V**G**Y

460 470 480 490  
 HUMAN **L**S**H**Q**V**P**I**S**F**H**K**H**W**N**I**D**P**V**K**V**Y**F**T**W**L**A.....P**S**D**E**D**K**A**R**Q**E**T**Q**K**G**F.....R**E**E**L**...  
 MOUSE **L**A**H**Q**I**P**V**S**F**H**K**H**W**H**I**D**P**V**K**V**Y**L**T**W**L**A.....P**S**E**E**D**Q**A**T**Q**E**T**Q**K**D**P.....R**E**E**L**...  
 ZEBRAFISH **L**S**H**Q**T**P**I**S**F**H**K**H**W**N**I**D**P**A**V**F**N**K**W**L.....K**N**E**K**H**T**E**G**L**Q**K**S**T.....R**E**E**L**...  
 FRUITFLY **L**Q**L**H**A**P**L**T**F**H**K**H**W**N**I**D**P**E**H**T**Y**R**R**W**L**G**S**M**V**N**R**S**A**P**L**A**A**H**K**E**R**Q**P**A**G**P**L**H**M**T**M**G**R**H**S**L**A**A**G**  
 STARFISH **L**Q**H**Q**T**P**V**S**F**H**K**H**L**N**A**D**P**L**A**V**Y**R**D**W**E**R.....H**A**D**E**V**D**S**R**T**H**Q**A**G**E**.....R**E**E**L**...



Figure S2

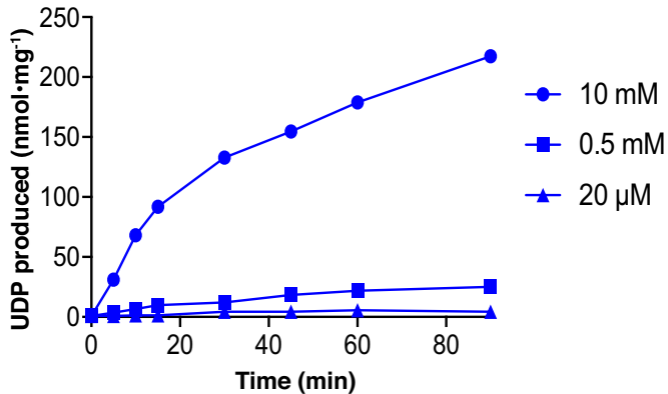

Figure S3

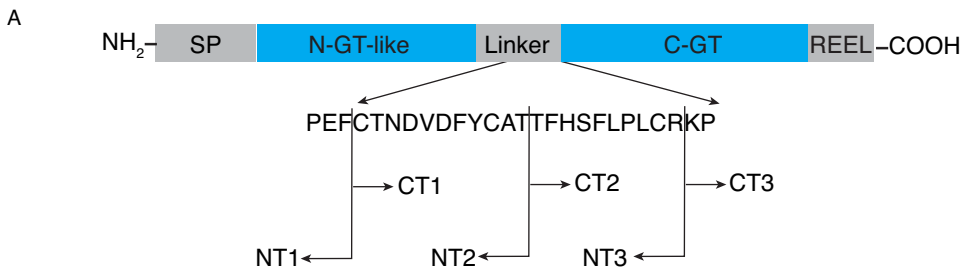

B

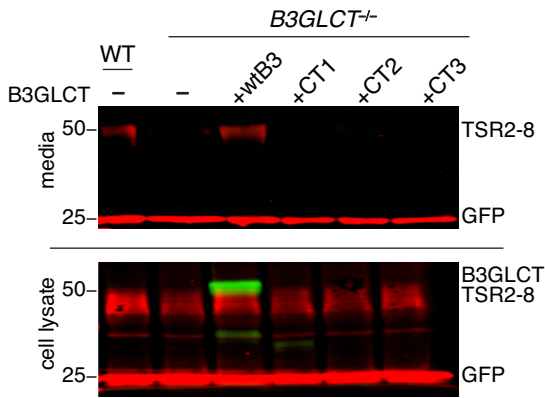

C

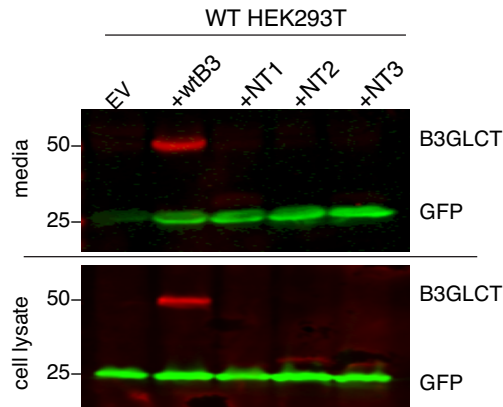



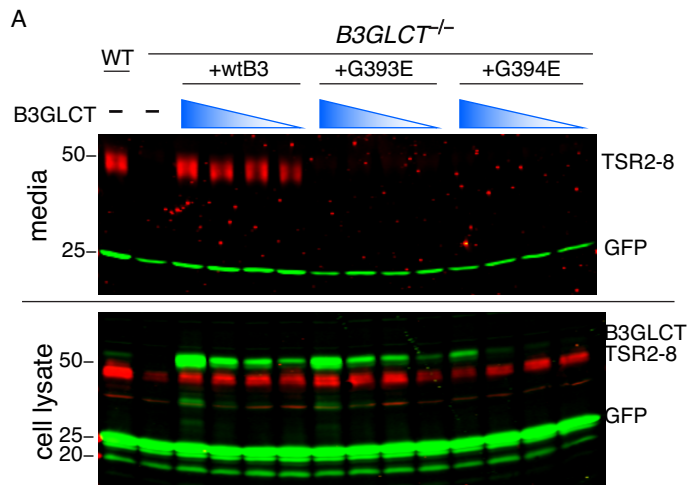**B**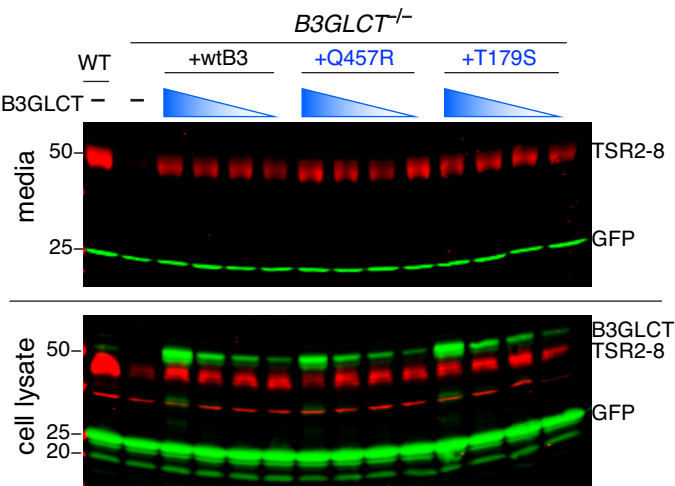**C**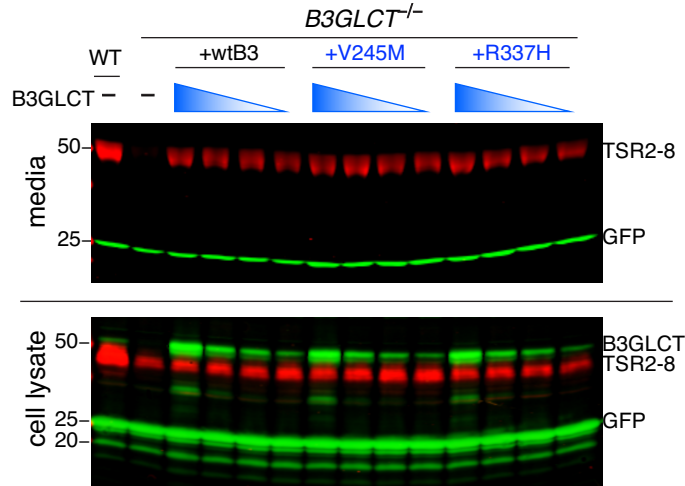

FigureS6

A

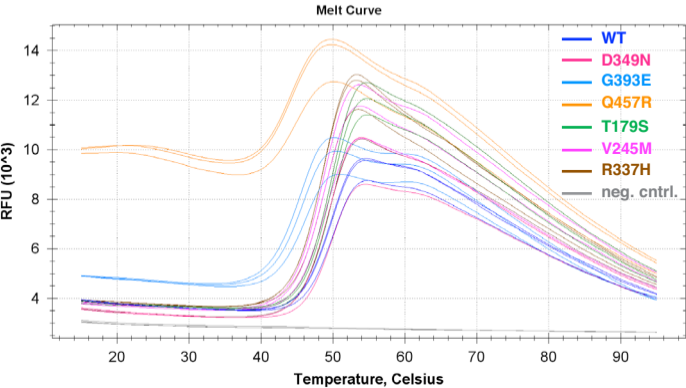

B

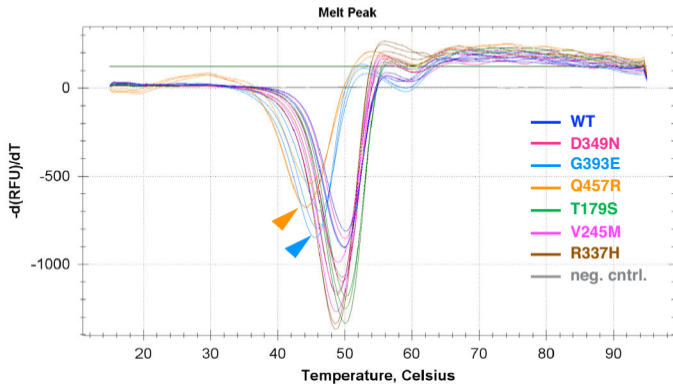

Figure S7

A

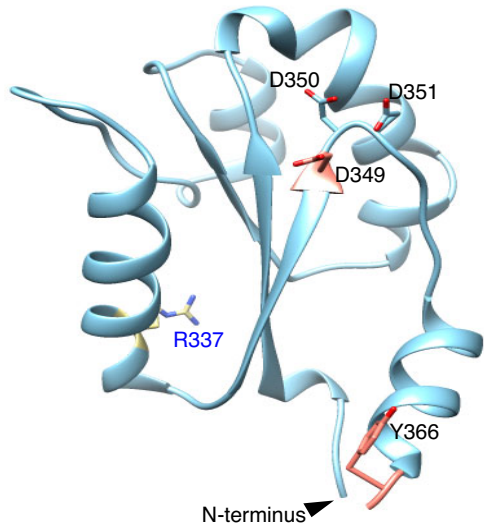

B

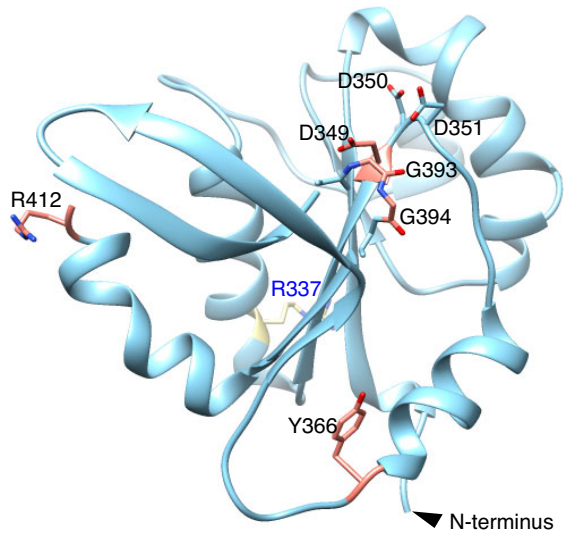

Figure S8

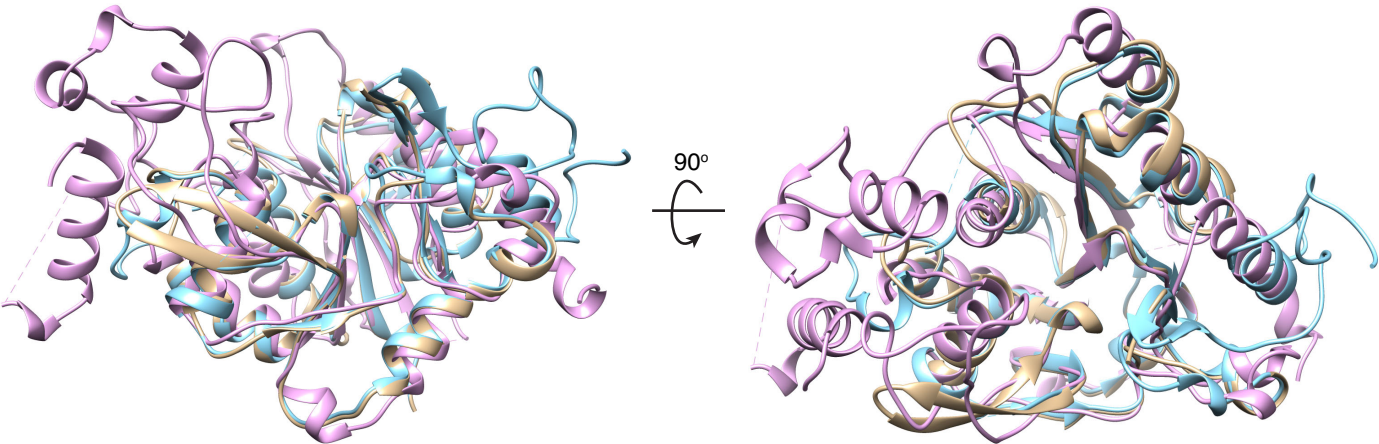

Figure S9

|              |                                                                                |     |
|--------------|--------------------------------------------------------------------------------|-----|
| B3GNT2_HUMAN | -----MS-VGRRRIKLLGILM                                                          | 15  |
| B3GLCT_HUMAN | MRPPACWLLAPPALLALLTCSLAFGLASEDTKKEVKQSQDLEKSGISRKNIDLKGIVF                     | 60  |
| MFNG_MOUSE   | -----                                                                          | 0   |
| B3GNT2_HUMAN | MANV----FIYFIMEVSKSS-----S-----QEKNKGGEV IIPKEKFWKIS                           | 52  |
| B3GLCT_HUMAN | VIQSQSNSFHAKRAEQLKKSILKQAADLTQELPSVLLHQLAKQEGAWTILPLLPHFSVT                    | 120 |
| MFNG_MOUSE   | -----                                                                          | 0   |
| B3GNT2_HUMAN | TPPEAYWNREQE-----KLNRYNPILSMLTNQTGEAGRLSNISHLNYCE----                          | 97  |
| B3GLCT_HUMAN | YSRNSSWIFFCEEETRIQIPKLLLETLRRYDPSKEWFLGKALHDEEATI IHHYAFSENPTV                 | 180 |
| MFNG_MOUSE   | -----                                                                          | 0   |
| B3GNT2_HUMAN | -----PDLRVTSVVTGFN-----NLPDRFKD-                                               | 118 |
| B3GLCT_HUMAN | FKYPDFAAGWALS IPLVNKLT KRLKSESLKSDFTIDLKHEIALYIWDKGGGPP LTPVPEF                | 240 |
| MFNG_MOUSE   | -----MHCRLFRGMAGAL---FTLL                                                      | 17  |
| B3GNT2_HUMAN | --FLLYLRCRN-----YSL LIDQPKCAK---KPFLL LAIKSL-TPHFARRQAIRES                     | 164 |
| B3GLCT_HUMAN | CTNDVDFYCATT-----FHSFLPL-----CRKPVKKKDI FVAVKTCCKK FHGDRIPIVKQT                | 290 |
| MFNG_MOUSE   | CVGLLSLRYHSSLSQRM IQGALRLNQRNPGPLELQLGDI FIAVKTTWAFHRSRLDLLLDT                 | 77  |
|              | : : . * : : : * * : : :                                                        |     |
| B3GNT2_HUMAN | WGQESNAGNQTVVRVFLGQTPPEDNHPDLS DMLKFE---SEKHQDILMWN YRDTFFNLS                  | 221 |
| B3GLCT_HUMAN | WESQAS-----LIEYSDY TENS IPTVDLG----IPN--TDRGHCGKTFA-----                       | 329 |
| MFNG_MOUSE   | WVSRIR-----QQT FIFTD SPDERLQERLGP HLVVTNCSAEHSH PAL SCK-----                   | 122 |
|              | * .. : : . *. . : : :                                                          |     |
| B3GNT2_HUMAN | LKEVLF LRWVSTSCPDTEFVFKG <b>DDD</b> VFVNTHHILNYLNSLSKTKAKDLFIGDVIHNAGP         | 281 |
| B3GLCT_HUMAN | ----ILERFLNRSQDKTAWLVIV <b>DDD</b> TLISISRLQHLLSCYD--SGEPVFLGER YGY---         | 380 |
| MFNG_MOUSE   | ----MAAEFD AFLVSGLRWFCHV <b>DDD</b> NYVNP KALLQLLKTFP--QDRDVYVGKPSLNRPI        | 176 |
|              | : .: :. *** :. : : *. . . : : *                                                |     |
| B3GNT2_HUMAN | HRDKKLKYYIPEVVYSGLYPPYAG <b>GGG</b> FLYSGHLALRLYHITDQVHL-----YP <b>IDDV</b>    | 334 |
| B3GLCT_HUMAN | -----GLGTGGYSYITG <b>GGG</b> MVFSREAVRLLASKCRC-Y-----SNDAP <b>DDM</b>          | 422 |
| MFNG_MOUSE   | HASEL---QSKNR TKLVRFWFATG <b>GAG</b> FCINRQLALKMVPWASGSHFVDTSALIRL <b>PDDC</b> | 233 |
|              | : : **.*: . . . : :                                                            | **  |
| B3GNT2_HUMAN | YTGMC LQ-KLGLVPEKHKGFR----TFDIEEK N---KNNICSYVDL-----ML----                    | 374 |
| B3GLCT_HUMAN | VLGMCF-SGLGIPVTHSPLFHQARPVDY--PKDYLSHQVPISF <b>H</b> KHWNIDPVKVYFT-WL          | 478 |
| MFNG_MOUSE   | TVGYIIIECKLGGRLQPSPLFHS <b>H</b> LETQLLGA AQLPEQVTL SYGVF----EGKLNVIKLP        | 289 |
|              | * : ** * : . . : : *                                                           |     |
| B3GNT2_HUMAN | -----V <b>H</b> SRKPQEMIDIWSQLQSAHLKC-----                                     | 397 |
| B3GLCT_HUMAN | APSDEDKARQETQKGFREEL-----                                                      | 498 |
| MFNG_MOUSE   | GPF----SHEEDPSRFRSLHCLLYPDT PWCPLLAAP                                          | 321 |
|              | :.. . : .                                                                      |     |



Figure S10

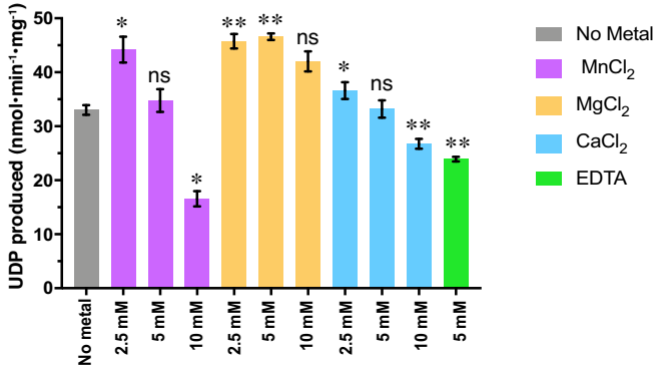

Figure S11

A

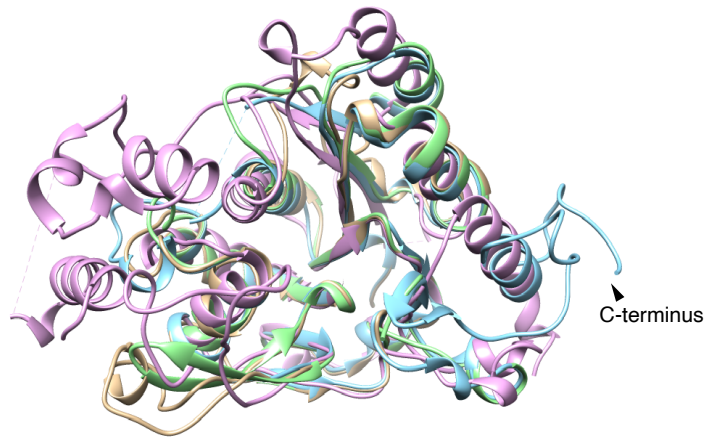

B

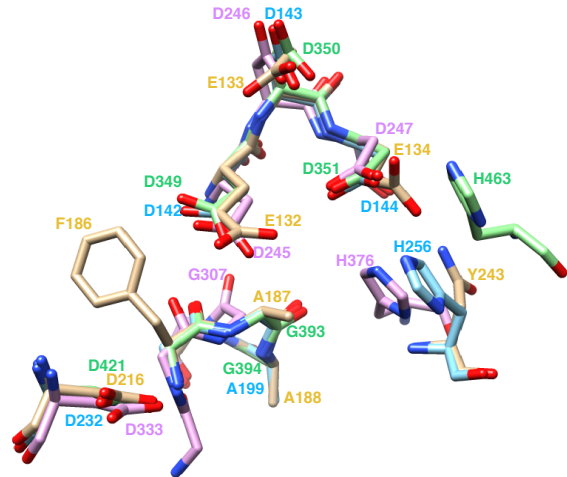

Supplement: mmc1.pdf [file mmc1.pdf]
